# Supplementary material for: Life's Essential 8 and Incident Hypertension Among US Hispanic/Latino Adults: Results From the Hispanic Community Health Study/Study of Latinos
Source: PubMed Central journal article supplement — J Am Heart Assoc. 2023 Dec 18;12(24):e031337. doi: 10.1161/JAHA.123.031337 (PMC10863779; doi:10.1161/jaha.123.031337), 2023-12-18
Supplement: JAH3-12-e031337-s001.pdf [file JAH3-12-e031337-s001.pdf]

# **SUPPLEMENTAL MATERIAL**

**Table S1. Baseline Characteristics of the Population with or without hypertension at Visit 1, HCHS/SOL 2008-2011.**

|                                             | Visit 1 Participants who participated in Visit 2<br>Unweighted N=10,493 |                                 |
|---------------------------------------------|-------------------------------------------------------------------------|---------------------------------|
|                                             | With Hypertension<br>n=4,826                                            | Without Hypertension<br>n=5,667 |
| <b>Characteristic</b>                       | <b>% (95% CI)</b>                                                       | <b>% (95% CI)</b>               |
| <b>Age group, yrs, %</b>                    |                                                                         |                                 |
| 18-39                                       | 21.6 (19.6, 23.8)                                                       | 63.5 (61.5, 65.4)               |
| 40-64                                       | 59.9 (57.7, 62.0)                                                       | 34.2 (32.3, 36.1)               |
| 65-74                                       | 18.5 (16.7, 20.4)                                                       | 2.3 (1.8, 3.0)                  |
| <b>Female</b>                               | 48.5 (46.5, 50.6)                                                       | 54.6 (52.6, 56.6)               |
| <b>Hispanic/Latino background, %</b>        |                                                                         |                                 |
| Central American                            | 7.1 (5.9, 8.6)                                                          | 7.7 (6.4, 9.4)                  |
| Cuban                                       | 27.8 (23.9, 32.1)                                                       | 15.7 (13.0, 18.8)               |
| Dominican                                   | 10.6 (9.0, 12.5)                                                        | 8.6 (7.2, 10.3)                 |
| Mexican                                     | 27.6 (24.5, 30.9)                                                       | 44.8 (41.3, 48.5)               |
| Puerto Rican                                | 19.5 (17.3, 22.0)                                                       | 13.0 (11.3, 14.8)               |
| South American                              | 3.7 (3.1, 4.4)                                                          | 5.3 (4.3, 6.4)                  |
| Mixed/Other                                 | 3.6 (2.8, 4.6)                                                          | 4.9 (4.0, 6.0)                  |
| <b>&lt; High school education, %</b>        | 37.5 (35.1, 39.8)                                                       | 29.0 (27.1, 31.0)               |
| <b>Annual income &lt;\$30,000, %</b>        | 65.9 (63.1, 68.5)                                                       | 59.9 (57.7, 62.2)               |
| <b>Nativity/years in the mainland US, %</b> |                                                                         |                                 |
| < 10 years in US 50 states/DC               | 24.7 (22.2, 27.5)                                                       | 31.0 (28.5, 33.5)               |
| ≥ 10 years in US 50 states/DC               | 60.6 (58.2, 63.0)                                                       | 41.9 (39.9, 44.0)               |
| Born in US 50 states/DC                     | 14.6 (12.7, 16.8)                                                       | 27.1 (25.1, 29.3)               |
| <b>Study Site</b>                           |                                                                         |                                 |
| Bronx, New York                             | 30.0 (26.5, 33.6)                                                       | 26.2 (23.2, 29.5)               |
| Chicago, Illinois                           | 12.2 (10.4, 14.3)                                                       | 18.4 (16.0, 21.0)               |
| Miami, Florida                              | 36.2 (31.4, 41.3)                                                       | 25.5 (21.6, 29.7)               |
| San Diego, California                       | 21.6 (18.4, 25.2)                                                       | 30.0 (26.2, 34.0)               |

HCHS/SOL: Hispanic Community Health Study/Study of Latinos; LE8: Life's Essential 8; SE: standard error; US: United States

The distribution of each characteristic differed based on baseline hypertension status ( $p < 0.05$  for all).

**Table S2. Mean LE8 score among US Hispanics age standardized to the US age distribution, HCHS/SOL 2008-2011.**

|                                   | <b>Overall</b>   | <b>Men</b>       | <b>Women</b>     |
|-----------------------------------|------------------|------------------|------------------|
|                                   | <b>Mean (SE)</b> | <b>Mean (SE)</b> | <b>Mean (SE)</b> |
| <b>Overall</b>                    | 67.3 (0.2)       | 67.5 (0.3)       | 67.0 (0.3)       |
| <b>Hispanic/Latino background</b> |                  |                  |                  |
| Central American                  | 68.2* (0.4)      | 68.1* (0.7)      | 68.2* (0.6)      |
| Cuban†                            | 63.0* (0.4)      | 63.9* (0.6)      | 61.9* (0.5)      |
| Dominican                         | 69.1* (0.4)      | 69.3* (0.7)      | 68.9* (0.5)      |
| Mexican†                          | 71.4 (0.3)       | 71.1 (0.4)       | 71.7 (0.4)       |
| Puerto Rican†                     | 62.0* (0.4)      | 63.6* (0.5)      | 60.4* (0.5)      |
| South American                    | 69.6* (0.6)      | 70.6 (0.9)       | 69.1* (0.7)      |
| Mixed/Other                       | 66.6* (0.8)      | 66.4* (1.0)      | 66.6* (1.4)      |

SE: standard error

All estimates are age standardized to the following age distributions:

For overall estimates: age 18-39: 39.45%; age 40-64: 46.95%; age 65-74: 13.60%

For estimates among men: age 18-39: 42.0%; age 40-64: 46.2%; age 65-74: 11.8%

For estimates among women: age 18-39: 36.9%; age 40-64: 47.7%; age 65-74: 15.4%

†indicates estimate differs significantly by sex (p<0.05)

\*indicates estimate differs significantly compared with Mexican American background (p<0.05)

**Table S3. Life's Essential 8 CV Health Metrics means according to socio-economic characteristics among US Hispanics, among participants with at least 6 of 8 metrics, n=16,245, HCHS/SOL 2008-2011.**

|                                     | <b>Overall</b>   | <b>Central American</b> | <b>Cuban</b>     | <b>Dominican</b> | <b>Mexican (ref)</b> | <b>Puerto Rican</b> | <b>South American</b> | <b>Other/Mixed</b> |
|-------------------------------------|------------------|-------------------------|------------------|------------------|----------------------|---------------------|-----------------------|--------------------|
|                                     | <b>Mean (SE)</b> | <b>Mean (SE)</b>        | <b>Mean (SE)</b> | <b>Mean (SE)</b> | <b>Mean (SE)</b>     | <b>Mean (SE)</b>    | <b>Mean (SE)</b>      | <b>Mean (SE)</b>   |
| <b>Characteristic</b>               |                  |                         |                  |                  |                      |                     |                       |                    |
| Overall                             | 68.0 (0.3)       | 69.2* (0.4)             | 62.1* (0.5)      | 70.0* (0.5)      | 72.6 (0.3)           | 61.7* (0.4)         | 69.9* (0.6)           | 69.5* (0.8)        |
| <b>Age group</b>                    |                  |                         |                  |                  |                      |                     |                       |                    |
| 18-39 (ref)                         | 72.5 (0.3)       | 72.7 (0.5)              | 68.9 (0.6)       | 73.3 (0.8)       | 75.3 (0.4)           | 66.4 (0.7)          | 75.0 (0.9)            | 71.9 (1.1)         |
| 40-64                               | 64.3* (0.3)      | 65.9* (0.6)             | 58.8* (0.5)      | 67.1* (0.6)      | 69.6* (0.4)          | 58.5* (0.5)         | 66.8* (0.7)           | 65.0* (1.3)        |
| 65-74                               | 60.6* (0.5)      | 62.0* (1.6)             | 58.2* (0.9)      | 62.5* (1.2)      | 65.7* (1.0)          | 58.0* (0.9)         | 61.5* (1.4)           | 61.2* (3.4)        |
| <b>Sex</b>                          |                  |                         |                  |                  |                      |                     |                       |                    |
| Male (ref)                          | 68.0 (0.3)       | 69.0 (0.7)              | 63.0 (0.6)       | 70.3 (0.7)       | 72.0 (0.4)           | 63.1 (0.5)          | 70.5 (0.9)            | 69.6 (1.0)         |
| Female                              | 67.9 (0.3)       | 69.4 (0.5)              | 61.1* (0.5)      | 69.8 (0.7)       | 73.1* (0.4)          | 60.3* (0.5)         | 69.4 (0.7)            | 69.3 (1.3)         |
| <b>Education</b>                    |                  |                         |                  |                  |                      |                     |                       |                    |
| < high school                       | 65.8* (0.3)      | 67.9* (0.6)             | 58.7* (1.0)      | 67.6* (0.7)      | 70.1* (0.4)          | 59.0* (0.6)         | 68.3 (1.1)            | 66.2 (2.2)         |
| ≥ high school (ref)                 | 69.0 (0.3)       | 70.1 (0.5)              | 63.0 (0.5)       | 71.4 (0.7)       | 74.0 (0.4)           | 63.3 (0.5)          | 70.4 (0.7)            | 70.7 (0.9)         |
| <b>Annual income</b>                |                  |                         |                  |                  |                      |                     |                       |                    |
| <\$30,000                           | 66.7* (0.3)      | 69.0 (0.5)              | 60.7* (0.6)      | 68.6* (0.6)      | 71.7* (0.4)          | 60.4* (0.5)         | 68.4* (0.7)           | 69.2 (1.1)         |
| ≥ \$30,000 (ref)                    | 70.3 (0.4)       | 69.9 (0.8)              | 64.5 (0.8)       | 73.4 (0.7)       | 73.8 (0.5)           | 63.9 (0.7)          | 73.1 (0.9)            | 70.3 (1.4)         |
| <b>Nativity/years in US</b>         |                  |                         |                  |                  |                      |                     |                       |                    |
| < 10 years in US 50 states/DC (ref) | 69.5 (0.4)       | 71.7 (0.6)              | 63.6 (0.5)       | 73.6 (0.8)       | 74.4 (0.6)           | 63.0 (1.6)          | 71.9 (1.0)            | 69.6 (2.6)         |
| ≥ 10 years in US 50 states/DC       | 66.6* (0.3)      | 67.3* (0.6)             | 59.6* (0.8)      | 68.3* (0.6)      | 71.6* (0.3)          | 59.3* (0.5)         | 68.1* (0.7)           | 66.7 (1.6)         |
| Born in US 50 states/DC             | 69.1 (0.4)       | 71.7 (1.7)              | 66.8* (1.4)      | 70.5 (1.9)       | 72.9 (0.7)           | 63.8 (0.6)          | 72.4 (2.1)            | 71.4 (1.0)         |
| <b>Study Site</b>                   |                  |                         |                  |                  |                      |                     |                       |                    |
| Bronx, New York                     | 66.6* (0.3)      | 69.4* (1.2)             | 63.0 (3.1)       | 70.1* (0.5)      | 71.7 (0.7)           | 61.3 (0.5)          | 68.1* (1.1)           | 71.0 (1.3)         |
| Chicago, Illinois                   | 71.3 (0.4)       | 73.3 (0.8)              | 69.7 (1.4)       | 73.6* (2.7)      | 73.7* (0.4)          | 62.8 (0.8)          | 74.3 (1.3)            | 70.7 (1.9)         |
| Miami, Florida                      | 63.8* (0.4)      | 67.9* (0.5)             | 62.0* (0.5)      | 66.0* (2.0)      | 71.3 (2.5)           | 60.9 (1.6)          | 68.7* (1.0)           | 66.5 (1.7)         |
| San Diego, California (ref)         | 72.1 (0.4)       | 74.6 (1.6)              | 68.5 (1.9)       | 79.6 (1.3)       | 72.2 (0.4)           | 67.5 (3.6)          | 73.6 (2.3)            | 69.6 (1.7)         |

ref: reference; SE: standard error; US: United States

\*indicates estimate differs from the given reference category (p<0.05).

**Table S4. Life's Essential 8 CV Health Metrics means according to socio-economic characteristics among US Hispanics, HCHS/SOL 2008-2011.**

|                                     | <b>Diet</b>      | <b>Physical Activity</b> | <b>Nicotine Exposure</b> | <b>Sleep Health</b> | <b>Body Mass Index</b> | <b>Blood Glucose</b> | <b>Blood Lipids</b> | <b>Blood Pressure</b> |
|-------------------------------------|------------------|--------------------------|--------------------------|---------------------|------------------------|----------------------|---------------------|-----------------------|
|                                     | <b>Mean (SE)</b> | <b>Mean (SE)</b>         | <b>Mean (SE)</b>         | <b>Mean (SE)</b>    | <b>Mean (SE)</b>       | <b>Mean (SE)</b>     | <b>Mean (SE)</b>    | <b>Mean (SE)</b>      |
| <b>Characteristic</b>               |                  |                          |                          |                     |                        |                      |                     |                       |
| Education                           |                  |                          |                          |                     |                        |                      |                     |                       |
| < high school                       | 45.7* (0.9)      | 71.0* (0.9)              | 68.3* (0.9)              | 82.8* (0.5)         | 55.9* (0.7)            | 74.5* (0.7)          | 60.7* (0.7)         | 68.9* (0.9)           |
| ≥ high school (ref)                 | 37.9 (0.8)       | 76.8 (0.7)               | 72.3 (0.7)               | 85.5 (0.4)          | 59.1 (0.6)             | 83.7 (0.4)           | 63.0 (0.5)          | 75.5 (0.5)            |
| Annual income                       |                  |                          |                          |                     |                        |                      |                     |                       |
| <\$30,000                           | 40.1* (0.7)      | 73.8* (0.7)              | 69.1* (0.7)              | 84.0* (0.4)         | 56.7* (0.5)            | 79.3* (0.4)          | 61.1* (0.5)         | 71.8* (0.6)           |
| ≥ \$30,000 (ref)                    | 42.9 (1.2)       | 78.5 (0.8)               | 74.5 (0.8)               | 86.1 (0.6)          | 59.1 (0.8)             | 83.0 (0.6)           | 63.5 (0.7)          | 76.4 (0.6)            |
| Nativity/years in US                |                  |                          |                          |                     |                        |                      |                     |                       |
| < 10 years in US 50 states/DC (ref) | 36.8 (1.3)       | 73.9 (1.0)               | 72.3 (1.1)               | 86.1 (0.5)          | 64.1 (0.7)             | 85.5 (0.5)           | 62.0 (0.8)          | 75.9 (0.8)            |
| ≥ 10 years in US 50 states/DC       | 48.5* (0.8)      | 72.5 (0.7)               | 73.1 (0.7)               | 85.0 (0.4)          | 55.0* (0.5)            | 74.5* (0.5)          | 57.5* (0.6)         | 67.9* (0.7)           |
| Born in US 50 states/DC             | 27.2* (1.0)      | 82.0* (0.9)              | 86.1* (0.5)              | 81.9* (0.7)         | 57.0* (1.1)            | 88.5* (0.6)          | 73.2* (0.9)         | 82.3* (0.6)           |
| Study Site                          |                  |                          |                          |                     |                        |                      |                     |                       |
| Bronx, New York                     | 30.3* (0.7)      | 78.9 (0.9)               | 71.2* (1.1)              | 81.1* (0.6)         | 55.2* (0.8)            | 80.2 (0.8)           | 67.0* (0.8)         | 71.9* (0.9)           |
| Chicago, Illinois                   | 53.7* (1.0)      | 78.5 (0.7)               | 71.8 (1.0)               | 85.0* (0.5)         | 57.3 (0.8)             | 79.7* (0.7)          | 64.9 (0.7)          | 80.8* (0.6)           |
| Miami, Florida                      | 27.4* (0.6)      | 67.2* (1.0)              | 67.2* (1.0)              | 85.5* (0.6)         | 60.2 (0.7)             | 80.9 (0.6)           | 56.2* (0.7)         | 66.9* (0.9)           |
| San Diego, California (ref)         | 57.4 (1.0)       | 77.7 (1.1)               | 74.5 (1.2)               | 87.1 (0.6)          | 59.0 (1.1)             | 81.6 (0.7)           | 62.6 (0.9)          | 77.7 (0.8)            |

ref: reference; SE: standard error; US: United States

\*indicates estimate differs from the given reference category (p<0.05).

**Table S5. Life's Essential 8 CV Health Metrics among participants with at least 6 of 8 metrics, standardized to study site, n=16,245, HCHS/SOL 2008-2011.**

|                       | <b>Overall</b>   | <b>Central American</b> | <b>Cuban</b>     | <b>Dominican</b> | <b>Mexican (ref)</b> | <b>Puerto Rican</b> | <b>South American</b> | <b>Other/Mixed</b> |
|-----------------------|------------------|-------------------------|------------------|------------------|----------------------|---------------------|-----------------------|--------------------|
|                       | <b>Mean (SE)</b> | <b>Mean (SE)</b>        | <b>Mean (SE)</b> | <b>Mean (SE)</b> | <b>Mean (SE)</b>     | <b>Mean (SE)</b>    | <b>Mean (SE)</b>      | <b>Mean (SE)</b>   |
| <b>LE8</b>            | 68.0 (0.2)       | 71.0 (0.6)              | 65.2* (1.0)      | 72.0 (0.8)       | 72.0 (0.8)           | 63.1* (1.1)         | 70.7 (0.8)            | 69.3* (0.8)        |
| <b>LE8 Components</b> |                  |                         |                  |                  |                      |                     |                       |                    |
| Diet                  | 40.0 (0.4)       | 42.8* (2.3)             | 28.2* (3.2)      | 57.6* (1.7)      | 51.4 (2.1)           | 19.0* (1.4)         | 38.2* (1.7)           | 36.7* (1.8)        |
| Physical Act          | 75.3 (0.5)       | 80.8 (1.8)              | 76.6 (2.2)       | 81.1 (1.7)       | 81.9 (1.9)           | 75.2 (2.4)          | 75.8 (2.9)            | 80.0 (2.1)         |
| Nicotine              | 70.3 (0.6)       | 78.9* (2.5)             | 72.4 (3.5)       | 83.5* (1.9)      | 68.8 (2.4)           | 61.0 (4.2)          | 78.6* (2.0)           | 66.9 (2.9)         |
| Sleep Health          | 84.5 (0.3)       | 85.7 (1.6)              | 84.6 (1.9)       | 85.1 (1.5)       | 86.7 (1.9)           | 82.2 (1.7)          | 86.5 (1.0)            | 81.1* (1.5)        |
| Body Mass Index       | 58.1 (0.4)       | 62.8 (1.7)              | 53.0* (2.5)      | 61.9 (1.6)       | 61.2 (1.9)           | 58.7 (2.2)          | 67.0* (1.3)           | 56.9 (2.1)         |
| Blood Glucose         | 80.7 (0.3)       | 80.6 (1.7)              | 83.8 (2.0)       | 78.8 (5.8)       | 83.2 (1.4)           | 76.6* (1.9)         | 84.7 (1.3)            | 84.6 (1.7)         |
| Blood Lipids          | 62.5 (0.4)       | 61.2 (2.0)              | 60.8 (4.3)       | 55.8 (7.6)       | 61.7 (2.5)           | 64.5 (2.5)          | 58.3 (2.2)            | 68.4 (2.3)         |
| Blood Pressure        | 73.4 (0.4)       | 75.6* (1.7)             | 64.5* (3.4)      | 72.5* (4.9)      | 82.7 (1.4)           | 70.4* (2.1)         | 78.3 (1.6)            | 79.6 (1.7)         |

ref: reference; SE: standard error; US: United States

\*indicates estimate differs from the given reference category (p<0.05).

**Table S6. Associations between LE7† score and LE7† CV health with incident hypertension overall and by Hispanic/Latino background, HCHS/SOL 2008-2017.**

|                           | <b>Overall</b>                      | <b>Central American</b>             | <b>Cuban</b>                        | <b>Dominican</b>     | <b>Mexican</b>                      | <b>Puerto Rican</b>                 | <b>South American</b>               | <b>Mixed/Other</b>                   |
|---------------------------|-------------------------------------|-------------------------------------|-------------------------------------|----------------------|-------------------------------------|-------------------------------------|-------------------------------------|--------------------------------------|
| <b>Exposure</b>           | IDR (95% CI)                        | IDR (95% CI)                        | IDR (95% CI)                        | IDR (95% CI)         | IDR (95% CI)                        | IDR (95% CI)                        | IDR (95% CI)                        | IDR (95% CI)                         |
| LE7†<br>(decrement of 10) | <b>1.15*</b><br><b>(1.09, 1.20)</b> | <b>1.32*</b><br><b>(1.16, 1.52)</b> | <b>1.11*</b><br><b>(1.02, 1.21)</b> | 1.13<br>(0.90, 1.42) | <b>1.12*</b><br><b>(1.03, 1.21)</b> | <b>1.18*</b><br><b>(1.06, 1.32)</b> | 1.06<br>(0.90, 1.26)                | 1.13<br>(0.84, 1.54)                 |
| CV health                 |                                     |                                     |                                     |                      |                                     |                                     |                                     |                                      |
| Low vs high               | <b>1.96*</b><br><b>(1.52, 2.52)</b> | <b>2.55*</b><br><b>(1.19, 5.50)</b> | <b>1.89*</b><br><b>(1.00, 3.60)</b> | 1.85<br>(0.59, 5.76) | <b>1.57*</b><br><b>(1.04, 2.36)</b> | <b>2.36*</b><br><b>(1.22, 4.55)</b> | <b>3.49*</b><br><b>(1.40, 8.68)</b> | 3.31<br>(0.70, 15.67)                |
| Mid vs high               | <b>1.50*</b><br><b>(1.22, 1.83)</b> | 1.42<br>(0.71, 2.85)                | 1.62<br>(0.87, 3.04)                | 1.25<br>(0.69, 2.24) | 1.30<br>(0.99, 1.71)                | 1.61<br>(0.85, 3.04)                | <b>2.07*</b><br><b>(1.01, 4.27)</b> | <b>5.95*</b><br><b>(1.59, 22.26)</b> |

CI: confidence interval; CV: cardiovascular; HCHS/SOL: Hispanic Community Health Study/Study of Latinos; IDR: incidence density ratio; LE7: Life's Essential 7 †LE7 score was calculated as the average of seven of the eight LE8 components (diet, physical activity, nicotine, sleep health, body mass index, blood lipids, and blood glucose).

Models are adjusted for age, sex, Hispanic/Latino background (except in stratified), income, education, nativity, health insurance, marital status, field center, and baseline systolic blood pressure.

The interaction between Hispanic/Latino background group and each LE8 CV health metric p<0.10 for body mass index and diet only.

\*Indicates estimates are significant (p<0.05)

CV health was defined as low (LE7 score < 50%), moderate (LE7 score 50 - <80%), or high (LE7 score
